# Supplementary material for: Mapping the genome of Plasmodium falciparum on the drug-like chemical space reveals novel anti-malarial targets and potential drug leads
Source: Royal Society of Chemistry journal article supplement (doi:10.1039/c2mb00008c), 2012-03-02
Supplement: c2mb00008c.xlsx [file c2mb00008c.xlsx]

## Sheet: identicalMatches_human_targ
10039641	Q07343
2953146	Q27686
44391475	P43235
3020289	P09884
2824465	P11802
10173796	P11802
23133323	P42858
44523374	P00533
44532601	P00533
44532205	P07949
44532204	P07949
9549305	P12931
1510388	P14174
3213	P68871
44522080	Q02880
443388	P78509
6917908	Q05932
6917908	P35251
2881753	P00390
16193440	P00390
44522391	Q08495
23618032	P18283
3060974	P11712
18660697	P69905
6917908	P35251
23133323	Q9Y694
24878895	Q9Y5Z0
44527701	Q9Y5Z0
44446207	Q9Y5Z0
11157167	Q9Y5Z0
44527488	Q9Y5Z0
10073810	Q9Y5Z0
44446207	P07339
24762079	Q12851
2329736	Q12851
1489267	Q12851
772885	Q9UGI6
2877655	Q9UGI6
44531660	P05062
6197	P21439
5578	P00374
73549	P15154
44533820	P06239
5329827	P35968
44532845	P35968
23133323	P42858
5311382	P12931
5328733	P15514
9549305	P12931
5328733	P15514
5311382	P12931
44533109	P15313
9914412	O14965
9914412	O14965
5133345	Q12809
44533011	Q12809
5578	P00374
18660697	P69905
18660697	P69905
5703	P03956
44523275	P11387
44391475	P43235
23133323	P42858
9894581	P00533
44532601	P00533
44532554	P28482
44528870	P00533
44532551	P04626
44523374	P00533
44534607	P15056
44532554	P28482
44532811	P04626
44528924	P04626
44532551	P04626
44528960	P04626
44528930	P04626
44532523	P04626
44527683	P04626
44536036	P35916
44529843	P00374
134531	P00374
93114	P00374
16236702	Q9HD43
10945514	P00374
54369	P78509
98652	O15360
5578	P00374
4993	P00374
446244	P00374
467897	P00374
467895	P00374
467890	P00374
467894	P00374
462591	P00374
6917908	P35251
54369	P78509
72440	P00352
5578	P00374
72440	P00352
44269041	P00374
44269049	P00374
467890	P00374
467896	P00374
467892	P00374
14570167	P00374
16804573	P00374
44529843	P00374
467899	P00374
44522492	P00374
44531519	P00374
2731322	P00374
44269024	P00374
467897	P00374
44531190	P00374
44532021	P00374
446244	P00374
14570165	P00374
44522493	P00374
72440	P00352
9551963	P00374
16207143	P00374
467895	P00374
93114	P00374
13953684	P00374
10945514	P00374
16207145	P00374
462591	P00374
13953688	P00374
2850414	P00374
24213637	P00374
24196123	P00374
10593093	P00374
134531	P00374
5578	P00374
44531585	P00374
13112760	P00374
177894	P00374
13112739	P00374
4993	P00374
19776217	P00374
467894	P00374
44531621	P00374
44531190	P00374
16236702	Q9HD43
16804573	P00374
6917908	P35251
16207143	P00374
2731322	P00374
24466	P25021
23133323	P42858
5328733	P15514
10215271	P49841
1069125	Q9HC29
6473490	Q9HC29
5613906	Q9HC29
6411129	P53350
10142586	O75676
5281628	O60870
96029	Q86VQ6
4210848	O96935
666009	O96935
5737438	O96935
44525558	O96017
10461815	P50591
44532791	Q16539
18177365	Q16539
44532554	P28482
2953078	P28482
6602553	P28482
1316619	P28482
2952918	P28482
658922	P28482
3060974	P28482
6602552	P28482
73580	P22102
2946791	Q12791

## Sheet: identicalMatches_human_targets.
PF_PROTEIN	PROTEIN	SMILES	CID	HUMAN PROTEIN TARGET
MAL13P1.118	Q07343	n#cn1ccc(c1)c1ccc(c(c1)oc1cccc1)oc	10039641	Q07343
PFF1300w	Q27686	clc1ccc(cc1)nc1nc(n)c2c(n1)cccc2	2953146	Q27686
PF11_0165	P09668	n#cn1ccc(c1)nc(=o)oc(cc1ccccc1)c	44391475	P43235
PFD0590c	P09884	ccn(cc(cnc1c2ccc(cc2nc2c1cc(oc)c(c2)oc)n(=o)o)o)cc	3020289	P09884
MAL13P1.279	P11802	o=c(nc1cc(nc2c1cccc2)n(c)c)nc1ccccc1	2824465	P11802
MAL13P1.279	P11802	cn1ccn(cc1)c1ccc(cc1c(f)(f)f)nc1nccc(n1)c1cnn2c1cccn2	10173796	P11802
PF13_0258	P17948	coc1cc2c(ncnc2cc1occ1ccn(cc1)c)nc1ccc(cc1f)br	23133323	P42858
PF13_0258	P55245	coc1cc2c(nc3cccc(c3)br)nc(nc2cc1oc)c	44523374	P00533
PF13_0258	P55245	coc1cc2nc(nc3ccc(cc3)c)nc(c2cc1oc)nc1ccc(cc1)c	44532601	P00533
PF13_0258	P07949	oc1cccc(c1)nc1ccnc2c1ccc(c2)c1ccccn1	44532205	P07949
PF13_0258	P07949	oc1ccc(c(c1)nc1ccnc2c1ccc(c2)c1ccccn1)c	44532204	P07949
PF13_0258	P08069	coc1ccc(cc1nc(=o)nc1cc(c)nc2c1cccc2)cl	9549305	P12931
PFL1420w	P14174	clc1ccc(cc1)n1sc2c(c1=o)ccc(c2)f	1510388	P14174
PF14_0316	P11388	cc1c2cnccc2c(c2c1c1ccccc1[nh]2)c	3213	P68871
PF14_0316	Q02880	c(ccnc1c2ccccc2nc2c1cccc2)cccnc1c2ccccc2nc2c1cccc2	44522080	Q02880
PF13_0140	Q05932	c#ccn(c1ccc(cc1)c(=o)nc(c(=o)o)ccc(=o)o)cc1ccc2c(c1)c(=o)nc([nh]2)n	443388	P78509
PF13_0140	Q05932	ccc(c1ccc(cc1)c(=o)nc(c(=o)o)ccc(=o)o)cc1cnc2c(n1)c(n)nc(n2)n	6917908	Q05932
PF13_0140	Q05932	ccc(c1ccc(cc1)c(=o)nc(c(=o)o)ccc(=o)o)cc1cnc2c(n1)c(n)nc(n2)n	6917908	P35251
PF14_0192	P00390	oc(c1ccc(c(c1)cl)cl)cn1c(=n)n(c2c1cccc2)ccn1ccccc1	2881753	P00390
PF14_0192	P00390	cn(ccn1c(=n)n(c2c1cccc2)cc(c1ccc(c(c1)cl)cl)o)c	16193440	P00390
PF14_0192	P28593	coc1ccc2c(c1)c(n)c1c(n2)cc(cc1)cl	44522391	Q08495
PFL0595c	P18283	occ1oc(c(c1nc(=o)c(cc1ccc(cc1)oc)n)o)n1cnc2c1ncnc2n(c)c	23618032	P18283
PF13_0271	ENSG00000001626	coc1cc2c(cc1oc)ccn1c2cc(=nc2c(c)cc(cc2c)c)n(c1=o)c	3060974	P11712
PF14_0455	ENSG00000103222	oc(c1cc(nc2c1cccc2c(f)(f)f)c(f)(f)f)c1ccccn1	18660697	P69905
PFB0895c	P35251	ccc(c1ccc(cc1)c(=o)nc(c(=o)o)ccc(=o)o)cc1cnc2c(n1)c(n)nc(n2)n	6917908	P35251
PFB0210c	Q9Y694	coc1cc2c(ncnc2cc1occ1ccn(cc1)c)nc1ccc(cc1f)br	23133323	Q9Y694
PF14_0076	Q9Y5Z0	ccnc1cc(cc(c1)n1ccccs1(=o)=o)c(=o)nc(c(cnc1ccccc1)o)cc1ccccc1	24878895	Q9Y5Z0
PF14_0076	Q9Y5Z0	ccnc1cc(cc(c1)n1ccccs1(=o)=o)c(=o)nc(c(cnc1ccc2c1cccc2)o)cc1ccccc1	44527701	Q9Y5Z0
PF14_0076	Q9Y5Z0	ccnc1cc(cc(c1)n1cccc1=o)c(=o)nc(c(cnc1ccc2c1cccc2)o)cc1ccccc1	44446207	Q9Y5Z0
PF14_0076	Q9Y5Z0	ccn1cc2c3c1cc(cc3n(s(=o)(=o)cc2)c)c(=o)nc(c(cnc1ccocc1)o)cc1ccccc1	11157167	Q9Y5Z0
PF14_0076	Q9Y5Z0	ccnc1cc(cc(c1)n1cccc1=o)c(=o)nc(c(cncc1cc(oc)cc(c1)oc)o)cc1ccccc1	44527488	Q9Y5Z0
PF14_0076	Q9Y5Z0	ccnc1cc(cc(c1)n1cccc1=o)c(=o)nc(c(cnc1cccc1)o)cc1ccccc1	10073810	Q9Y5Z0
PF14_0076	P07339	ccnc1cc(cc(c1)n1cccc1=o)c(=o)nc(c(cnc1ccc2c1cccc2)o)cc1ccccc1	44446207	P07339
PFF0520w	Q12851	coc1cc2nc(nc(c2cc1oc)n)n1ccn(cc1)c1cc(c)ccc1c	24762079	Q12851
PFF0520w	Q12851	ccn(ccnc(=o)c1ccc(cc1)nc(=o)c1cn(nc1c1cccs1)c1ccccc1)cc	2329736	Q12851
PFF0520w	Q12851	coc1cc2c(cc1oc)nc(n(c2=n)cc1ccc(c(c1)cl)oc)scc1ccc(cc1)c	1489267	Q12851
PF13_0072	Q9UGI6	c1ccc(nc1)nc1scc(n1)c1ccccn1	772885	Q9UGI6
PF13_0072	Q9UGI6	cc1ccnc(c1)nc1scc(n1)c1ccccn1	2877655	Q9UGI6
PF14_0425	P05062	c1cn=c(n1)c1ccc(cc1)c1[nh]c2c(c1)ccc(c2)c1=nccn1	44531660	P05062
PFE1150w	P21439	cc1cc(c)c(=o)c(c1)c(cc1cc(=o)nc(=o)c1)o	6197	P21439
PFE1150w	P08183	coc1cc(cc2cnc(nc2n)n)cc(c1oc)oc	5578	P00374
PFE1150w	P08183	o=c1c2nc3ccccc3c(=o)n2c2c1cccc2	73549	P15154
PF13_0085	P06239	oc1cc(ccc1cl)c1nc([nh]c1c1ccncc1)c1ccccc1	44533820	P06239
PF13_0085	P35968	o=c(nc1ccc(cc1)c(=o)c)nc1ccc(cc1)n(c1ccnc(n1)nc1cccc(c1)cs(=o)(=o)c)c	5329827	P35968
PF13_0085	P35968	ccnc(=o)nc1ccc(cc1)n(c1ccnc(n1)nc1ccc(cc1)cs(=o)(=o)c)c	44532845	P35968
PF13_0085	P35968	coc1cc2c(ncnc2cc1occ1ccn(cc1)c)nc1ccc(cc1f)br	23133323	P42858
PF13_0085	P14084	ccn(ccoc1ccc(cc1)nc1ncc2c(n1)n(c)c(=o)c(c2)c1c(cl)cccc1cl)cc	5311382	P12931
PF13_0085	P14084	clc1cccc(c1c1cc2cnc(nc2n(c1=o)c)nc1ccc(cc1)n1ccocc1)cl	5328733	P15514
PF13_0085	P12931	coc1ccc(cc1nc(=o)nc1cc(c)nc2c1cccc2)cl	9549305	P12931
PF13_0085	P12931	clc1cccc(c1c1cc2cnc(nc2n(c1=o)c)nc1ccc(cc1)n1ccocc1)cl	5328733	P15514
PF13_0085	P12931	ccn(ccoc1ccc(cc1)nc1ncc2c(n1)n(c)c(=o)c(c2)c1c(cl)cccc1cl)cc	5311382	P12931
PFD0305c	P15313	ccn(cccnc(=o)c(=cc=cc1[nh]c2c(c1)cc(c(c2)cl)cl)oc)cc	44533109	P15313
PFC0385c	P97477	coc1cc2c(ncnc2cc1occcn1ccocc1)nc1ccc(cc1)nc(=o)c1ccccc1	9914412	O14965
PFC0385c	O14965	coc1cc2c(ncnc2cc1occcn1ccocc1)nc1ccc(cc1)nc(=o)c1ccccc1	9914412	O14965
PF14_0346	Q12809	n#cc(c1ccc2c(n1)nc(cc2c(f)(f)f)c(f)(f)f)c1ccc(cc1)c	5133345	Q12809
PF14_0346	Q12809	brc1ccc2c(c1)c1cccc(c1[nh]2)nc(c1ccccc1)c	44533011	Q12809
PF14_0346	Q12809	coc1cc(cc2cnc(nc2n)n)cc(c1oc)oc	5578	P00374
PF14_0346	Q12809	oc(c1cc(nc2c1cccc2c(f)(f)f)c(f)(f)f)c1ccccn1	18660697	P69905
PF14_0346	O95259	oc(c1cc(nc2c1cccc2c(f)(f)f)c(f)(f)f)c1ccccn1	18660697	P69905
PF08_0034	Q92831	o=c1c2cccnc2sn1c1ccccc1	5703	P03956
PFE0520c	P11387	ccc1(o)c(=o)occ2c1cc1c3nc4cc5occoc5cc4c(c3cn1c2=o)cn1ccn(cc1)c	44523275	P11387
PF11_0162	P43235	n#cn1ccc(c1)nc(=o)oc(cc1ccccc1)c	44391475	P43235
PFB0520w	Q9UF33	coc1cc2c(ncnc2cc1occ1ccn(cc1)c)nc1ccc(cc1f)br	23133323	P42858
PFB0520w	P00533	fc1cccc(c1)coc1ccc(cc1cl)nc1ncnc2c1cc(cc2)c1ccc(o1)coccs(=o)(=o)c	9894581	P00533
PFB0520w	P00533	coc1cc2nc(nc3ccc(cc3)c)nc(c2cc1oc)nc1ccc(cc1)c	44532601	P00533
PFB0520w	P00533	fc1cccc(c1)coc1ccc(cc1cl)nc1ncnc2c1cc(cc2)c1csc(n1)cnccs(=o)(=o)c	44532554	P28482
PFB0520w	P00533	cn(cc1ccc([nh]1)c1sc2c(c1)c(ncn2)nc1ccc(c(c1)cl)occ1cccc(c1)f)c	44528870	P00533
PFB0520w	P00533	clc1cc(ccc1occ1ccccc1)nc1ncnc2c1cc(cc2)c1csc(n1)cnccs(=o)(=o)c	44532551	P04626
PFB0520w	P00533	coc1cc2c(nc3cccc(c3)br)nc(nc2cc1oc)c	44523374	P00533
PFB0520w	P15056	ncc(c1nc(c([nh]1)c1ccncc1)c1ccc(c(c1)o)cl)(c)c	44534607	P15056
PFB0520w	P04626	fc1cccc(c1)coc1ccc(cc1cl)nc1ncnc2c1cc(cc2)c1csc(n1)cnccs(=o)(=o)c	44532554	P28482
PFB0520w	P04626	fc1cccc(c1)coc1ccc(cc1cl)nc1ncnc2c1sc(c2)c1csc(c1)cnccs(=o)(=o)c	44532811	P04626
PFB0520w	P04626	cn(cc1ccc([nh]1)c1cc2c(s1)c(ncn2)nc1ccc(c(c1)cl)occ1cccc(c1)f)c	44528924	P04626
PFB0520w	P04626	clc1cc(ccc1occ1ccccc1)nc1ncnc2c1cc(cc2)c1csc(n1)cnccs(=o)(=o)c	44532551	P04626
PFB0520w	P04626	ccncc1ccc([nh]1)c1cc2c(s1)c(ncn2)nc1ccc(c(c1)cl)occ1cccc(c1)f	44528960	P04626
PFB0520w	P04626	fc1cccc(c1)coc1ccc(cc1cl)nc1ncnc2c1cc(s2)c1ccc([nh]1)cnccs(=o)(=o)c	44528930	P04626
PFB0520w	P04626	clc1cc(ccc1occ1ccccc1)nc1ncnc2c1cc(cc2)c1ccc(o1)cnccs(=o)(=o)c	44532523	P04626
PFB0520w	P04626	o=c(n1ccocc1)oc1cnc(c1)c#cc1cc2c(s1)c(ncn2)nc1ccc2c(c1)ccn2s(=o)(=o)c1cccs1	44527683	P04626
PFB0520w	P35916	o=c(nc1cc(ccc1f)c(f)(f)f)nc1ccc(cc1)c1coc2c1c(n)ncn2	44536036	P35916
PFD0830w	P13922	nc1=nc(n(c(=n1)n)c1ccc(c(c1)cl)cl)c1ccccc1	44529843	P00374
PFD0830w	P13922	clc1ccc(cc1)c1c(c)nc(nc1n)n	134531	P00374
PFD0830w	P13922	ccc1nc(n)nc(c1c1ccccc1)n	93114	P00374
PFD0830w	P13922	clc1cccc(c1)n1c(=nc(=nc1(c)c)n)n	16236702	Q9HD43
PFD0830w	P13922	ccc1nc(n)nc(c1c1ccc(cc1)c(c)(c)c)n	10945514	P00374
PFD0830w	Q920D2	coc1ccc(cc1cc1cnc2c(c1c)c(n)nc(n2)n)oc	54369	P78509
PFD0830w	Q920D2	nc1nc(n)c2c(n1)ccc(c2)s(=o)(=o)c1ccc2c(c1)cccc2	98652	O15360
PFD0830w	Q920D2	coc1cc(cc2cnc(nc2n)n)cc(c1oc)oc	5578	P00374
PFD0830w	Q920D2	ccc1nc(n)nc(c1c1ccc(cc1)cl)n	4993	P00374
PFD0830w	P22906	nc1nc(n)c2c(n1)cccc2sc1ccccc1	446244	P00374
PFD0830w	P22906	cccc1cc2c(n1cc)ccc1c2c(n)nc(n1)n	467897	P00374
PFD0830w	P22906	nc1nc(n)c2c(n1)ccc1c2cc(n1c(c)c)c	467895	P00374
PFD0830w	P22906	nc1nc(n)c2c(n1)ccc1c2cc(n1c)c	467890	P00374
PFD0830w	P22906	ccn1c(cc)cc2c1ccc1c2c(n)nc(n1)n	467894	P00374
PFD0830w	P22906	fc1ccc(cc1)sc1cccc2c1c(n)nc(n2)n	462591	P00374
PFD0830w	P00381	ccc(c1ccc(cc1)c(=o)nc(c(=o)o)ccc(=o)o)cc1cnc2c(n1)c(n)nc(n2)n	6917908	P35251
PFD0830w	Q07422	coc1ccc(cc1cc1cnc2c(c1c)c(n)nc(n2)n)oc	54369	P78509
PFD0830w	Q07422	oc(=o)ccc(c(=o)o)nc(=o)c1ccc(cc1)n(cc1cnc2c(n1)c(n)nc(n2)n)c	72440	P00352
PFD0830w	Q07422	coc1cc(cc2cnc(nc2n)n)cc(c1oc)oc	5578	P00374
PFD0830w	P04818	oc(=o)ccc(c(=o)o)nc(=o)c1ccc(cc1)n(cc1cnc2c(n1)c(n)nc(n2)n)c	72440	P00352
PFD0830w	P00374	coc(=o)cccccoc1cc(cc(c1oc)oc)cc1cnc(nc1n)n	44269041	P00374
PFD0830w	P00374	coc1c(occccccc(=o)o)cc(cc1oc)cc1cnc(nc1n)n	44269049	P00374
PFD0830w	P00374	nc1nc(n)c2c(n1)ccc1c2cc(n1c)c	467890	P00374
PFD0830w	P00374	ccn1c(cc2c1ccc1c2c(n)nc(n1)n)c(c)c	467896	P00374
PFD0830w	P00374	nc1nc(n)c2c(n1)ccc1c2cc([nh]1)c(c)c	467892	P00374
PFD0830w	P00374	cccoc1cc(cc(c1oc)oc)cc1cnc(nc1n)n	14570167	P00374
PFD0830w	P00374	cc1ccc(cc1)n1c(=nc(=nc1(c)c)n)n	16804573	P00374
PFD0830w	P00374	nc1=nc(n(c(=n1)n)c1ccc(c(c1)cl)cl)c1ccccc1	44529843	P00374
PFD0830w	P00374	ccc(n1c(c)cc2c1ccc1c2c(n)nc(n1)n)(c)c	467899	P00374
PFD0830w	P00374	cccc1n=c(n)n=c(n1c1ccc(cc1)cl)n	44522492	P00374
PFD0830w	P00374	cccc1cc(cc2cnc(nc2n)n)cc(c1oc)c=cc	44531519	P00374
PFD0830w	P00374	nc1=nc(n(c(=n1)n)c1cccc(c1)c(f)(f)f)(c)c	2731322	P00374
PFD0830w	P00374	coc1cc(cc(c1oc)occcc(=o)o)cc1cnc(nc1n)n	44269024	P00374
PFD0830w	P00374	cccc1cc2c(n1cc)ccc1c2c(n)nc(n1)n	467897	P00374
PFD0830w	P00374	ccccccoc1ccc(cc1)n1c(=nc(=nc1(c)c)n)n	44531190	P00374
PFD0830w	P00374	ic1cccc(c1)n1c(=nc(=nc1(c)c)n)n	44532021	P00374
PFD0830w	P00374	nc1nc(n)c2c(n1)cccc2sc1ccccc1	446244	P00374
PFD0830w	P00374	cccc1cc(cc2cnc(nc2n)n)cc(c1oc)cc=c	14570165	P00374
PFD0830w	P00374	cccc1n=c(n)n=c(n1c1ccc(cc1)c)n	44522493	P00374
PFD0830w	P00374	oc(=o)ccc(c(=o)o)nc(=o)c1ccc(cc1)n(cc1cnc2c(n1)c(n)nc(n2)n)c	72440	P00352
PFD0830w	P00374	coc1ccc(cc1)n1c(=nc(=nc1(c)c)n)n	9551963	P00374
PFD0830w	P00374	nc1=nc(n(c(=n1)n)c1ccc(c(c1)cl)cl)(c)c	16207143	P00374
PFD0830w	P00374	nc1nc(n)c2c(n1)ccc1c2cc(n1c(c)c)c	467895	P00374
PFD0830w	P00374	ccc1nc(n)nc(c1c1ccccc1)n	93114	P00374
PFD0830w	P00374	cccc1cc(cc2cnc(nc2n)n)cc(c1oc)oc	13953684	P00374
PFD0830w	P00374	ccc1nc(n)nc(c1c1ccc(cc1)c(c)(c)c)n	10945514	P00374
PFD0830w	P00374	ic1ccc(cc1)n1c(=nc(=nc1(c)c)n)n	16207145	P00374
PFD0830w	P00374	fc1ccc(cc1)sc1cccc2c1c(n)nc(n2)n	462591	P00374
PFD0830w	P00374	ccoc1cc(cc2cnc(nc2n)n)cc(c1oc)oc	13953688	P00374
PFD0830w	P00374	brc1ccc(cc1)n1c(=nc(=nc1(c)c)n)n	2850414	P00374
PFD0830w	P00374	cc1ccc(cc1)n1c(=nc(=nc1c1ccccc1)n)n	24213637	P00374
PFD0830w	P00374	cccoc1ccc(cc1)n1c(=nc(=nc1(c)c)n)n	24196123	P00374
PFD0830w	P00374	ccc(c1ccc(cc1)c(=o)o)cc1cnc2c(n1)c(n)nc(n2)n	10593093	P00374
PFD0830w	P00374	clc1ccc(cc1)c1c(c)nc(nc1n)n	134531	P00374
PFD0830w	P00374	coc1cc(cc2cnc(nc2n)n)cc(c1oc)oc	5578	P00374
PFD0830w	P00374	coc1c(occcccc(=o)o)cc(cc1oc)cc1cnc(nc1n)n	44531585	P00374
PFD0830w	P00374	cccc1cc(cc2cnc(nc2n)n)cc(c1oc)ccc	13112760	P00374
PFD0830w	P00374	ccc(n1c(c)cc2c1ccc1c2c(n)nc(n1)n)cc	177894	P00374
PFD0830w	P00374	cccc1cc(cc2cnc(nc2n)n)cc(c1o)ccc	13112739	P00374
PFD0830w	P00374	ccc1nc(n)nc(c1c1ccc(cc1)cl)n	4993	P00374
PFD0830w	P00374	nc1nc(n)c2c(n1)ccc1c2ccc1	19776217	P00374
PFD0830w	P00374	ccn1c(cc)cc2c1ccc1c2c(n)nc(n1)n	467894	P00374
PFD0830w	P00374	nc1=nc(n(c(=n1)n)c1ccc(cc1)c(c)(c)c)(c)c	44531621	P00374
PFD0830w	P16184	ccccccoc1ccc(cc1)n1c(=nc(=nc1(c)c)n)n	44531190	P00374
PFD0830w	P16184	clc1cccc(c1)n1c(=nc(=nc1(c)c)n)n	16236702	Q9HD43
PFD0830w	P16184	cc1ccc(cc1)n1c(=nc(=nc1(c)c)n)n	16804573	P00374
PFD0830w	P00376	ccc(c1ccc(cc1)c(=o)nc(c(=o)o)ccc(=o)o)cc1cnc2c(n1)c(n)nc(n2)n	6917908	P35251
PFD0830w	P00375	nc1=nc(n(c(=n1)n)c1ccc(c(c1)cl)cl)(c)c	16207143	P00374
PFD0830w	P00375	nc1=nc(n(c(=n1)n)c1cccc(c1)c(f)(f)f)(c)c	2731322	P00374
PFD0830w	P00375	nc1nc(c)c(c(n1)n)c1ccc(c(c1)cl)cl	24466	P25021
MAL7P1.100	Q9HC98	coc1cc2c(ncnc2cc1occ1ccn(cc1)c)nc1ccc(cc1f)br	23133323	P42858
PFF1120c	P15514	clc1cccc(c1c1cc2cnc(nc2n(c1=o)c)nc1ccc(cc1)n1ccocc1)cl	5328733	P15514
PFC0525c	P49841	on(=o)c1cccc(c1)nc1nccc(n1)c1cnn2c1cccn2	10215271	P49841
PF14_0021	Q9HC29	clc1ccc(cc1)oc1ccc(cc1cl)n1c(=nc(=nc1(c)c)n)n	1069125	Q9HC29
PF14_0021	Q9HC29	clc1ccc2c(c1)nccc2nccnc(=o)c1ccccc1f	6473490	Q9HC29
PF14_0021	Q9HC29	o=c(c1[nh][nh]c(=c2c=c(cl)c=cc2=o)c1)nc1ccc(cc1)s(=o)(=o)n1ccocc1	5613906	Q9HC29
PFL2250c	P53350	ccoc1cc(ccc1oc(c)c)c1nnc2c(n1)c(=o)n(c(=o)[nh]2)c	6411129	P53350
PFL2250c	O75676	ccs(=o)(=o)nc1ccc2c(c1)c(=c(c1ccccc1)nc1ccc(cc1)cn1ccccc1)c(=o)n2	10142586	O75676
PF14_0643	O60870	coc1c(o)cc2c(c1o)c(=o)cc(o2)c1ccc(cc1)o	5281628	O60870
PFI1170c	Q86VQ6	on(=o)c1ccc2c(c1)nccn2	96029	Q86VQ6
MAL13P1.56	O96935	brc1cc2oc3c(c2c(c1o)cncc1ccccc1)cccc3	4210848	O96935
MAL13P1.56	O96935	cc1cccc2c1nc(nc1=ncn(cn1)cccn1ccocc1)nc2c	666009	O96935
MAL13P1.56	O96935	cc1cccn(c1)cc1c(o)ccc2c1oc(n)c(c2=o)c1nc2c(s1)cccc2	5737438	O96935
PFB0815w	O96017	coc1cc(ccc1oc)c1cnc(c(c1)c1ccc(cc1)c(=o)n)n	44525558	O96017
PF14_0294	Q16539	o=c1nc2c(c1=cc1[nh]c(c(c1c)c(=o)n1cccc1cn1cccc1)c)cc(cc2)s(=o)(=o)cc1c(cl)cccc1cl	10461815	P50591
PF14_0294	Q16539	o=c(c1ccc1)nc1ccc(c(c1)c1ccc(cc1)c(=o)ncc1cc1)c	44532791	Q16539
PF14_0294	Q16539	ccc1cn2ccc3c(c2cc1cc1nccc2c1cc(oc)c(c2)oc)cc(c(c3)oc)oc	18177365	Q16539
PF14_0294	P28482	fc1cccc(c1)coc1ccc(cc1cl)nc1ncnc2c1cc(cc2)c1csc(n1)cnccs(=o)(=o)c	44532554	P28482
PF14_0294	P28482	oc1ccc(cc1)nc1nc(ncc2ccco2)c2c(n1)cccc2	2953078	P28482
PF14_0294	P28482	oc1cccc(c1)nc1nc(ncc2ccco2)c2c(n1)cccc2	6602553	P28482
PF14_0294	P28482	brc1ccc(cc1)c1ccc(o1)c(=o)nc1ccc(cc1)cn1ccocc1	1316619	P28482
PF14_0294	P28482	oc1ccccc1nc1nc(ncc2ccco2)c2c(n1)cccc2	2952918	P28482
PF14_0294	P28482	o=c(nc1ccc(cc1)cl)nc1ccc2c(c1)n1ccn=c1s2	658922	P28482
PF14_0294	P28482	coc1cc2c(cc1oc)ccn1c2cc(=nc2c(c)cc(cc2c)c)n(c1=o)c	3060974	P28482
PF14_0294	P28482	oc1ccc(cc1)nc1nc2ccccc2c(n1)n1cccc1	6602552	P28482
MAL13P1.67	P22102	o=cn(c1ccc(cc1)c(=o)nc(c(=o)o)ccc(=o)o)cc1ccc2c(c1)c(=o)nc([nh]2)n	73580	P22102
PFL1315w	Q12791	coc1cc(ccc1nc(=o)c1cc(cl)ccc1o)n(=o)o	2946791	Q12791
